# Supplementary material for: Unraveling the infrared detection properties of Bi2Te3 depending on thickness under the semiconductor and metal surface states
Source: Royal Society of Chemistry journal article supplement (doi:10.1039/d4nr05067c), 2025-01-01
Supplement: d4nr05067c1.pdf [file d4nr05067c1.pdf]

## Supporting Information

### Unraveling the Infrared Detection Properties of Bi<sub>2</sub>Te<sub>3</sub> Depending on Thickness from Semiconductor to Metal Surface States

Qijun Kao<sup>a#</sup>, Yongfeng Jia<sup>d#</sup>, Zhihao Wu<sup>a</sup>, Zhangxinyu Zhou<sup>a</sup>, Xun Ge<sup>b</sup>, Jian Peng<sup>a</sup>, Piotr Martyniuk<sup>c</sup>, Jin Wang<sup>b,c\*</sup>, Chuanbin Wang<sup>a\*</sup>, Fang Wang<sup>b\*</sup>

The R and D\* of all Bi<sub>2</sub>Te<sub>3</sub> samples gradually decrease as the light intensity increases, demonstrating that the device performs better under lower light intensity detection.

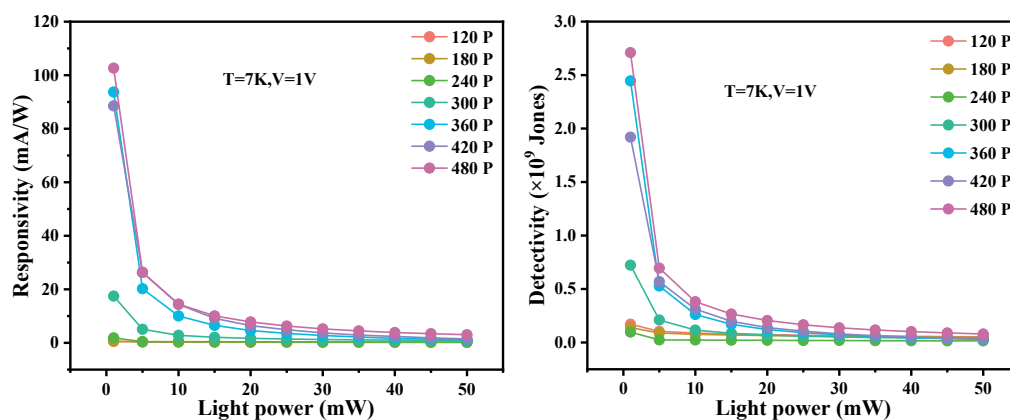

S1. Dependence curves of R and D\* on incident light power.

<sup>a</sup> State Key Lab of Advanced Technology for Materials Synthesis and Processing, Wuhan University of Technology, Wuhan 430070, China

<sup>b</sup> Shanghai Institute of Technical Physics, Chinese Academy of Science, Shanghai 200080, China

<sup>c</sup> MOE Key Laboratory of Advanced Micro-Structure Materials, Shanghai Frontiers Science Center of Digital Optics, Institute of Precision Optical Engineering, and School of Physics Science and Engineer, Tongji University, Shanghai 200092, China

<sup>d</sup> School of Materials and Chemistry, Southwest University of Science and Technology, Mianyang 621010, China

<sup>e</sup> Institute of Applied Physics, Military University of Technology, 2 Kaliskiego St., 00-908 Warsaw, Poland

<sup>#</sup> These authors contributed equally to this work.

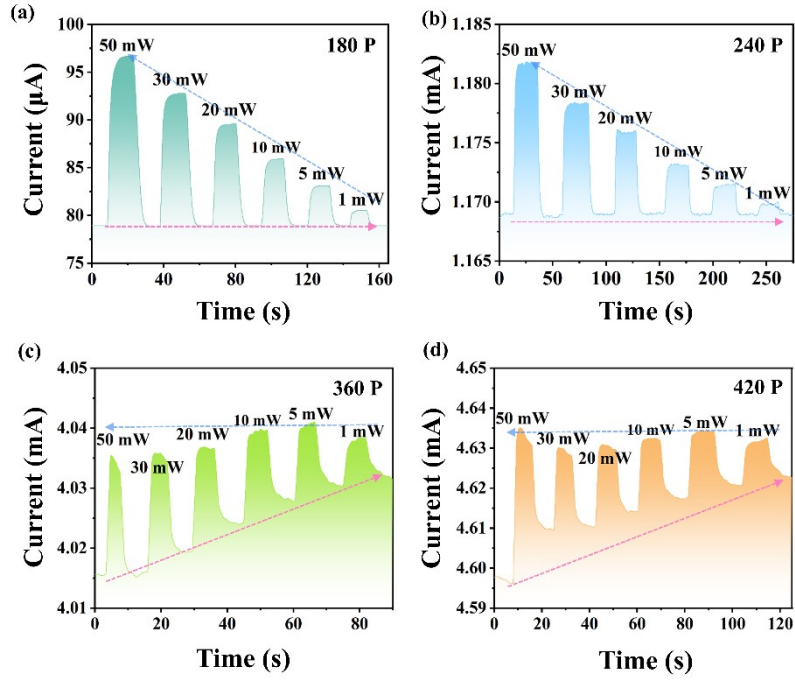

S2. Time cycle curves of Bi<sub>2</sub>Te<sub>3</sub> thin films under different light powers (a) 180 P, (b) 240 P, (c) 360 P, (d) 420 P.

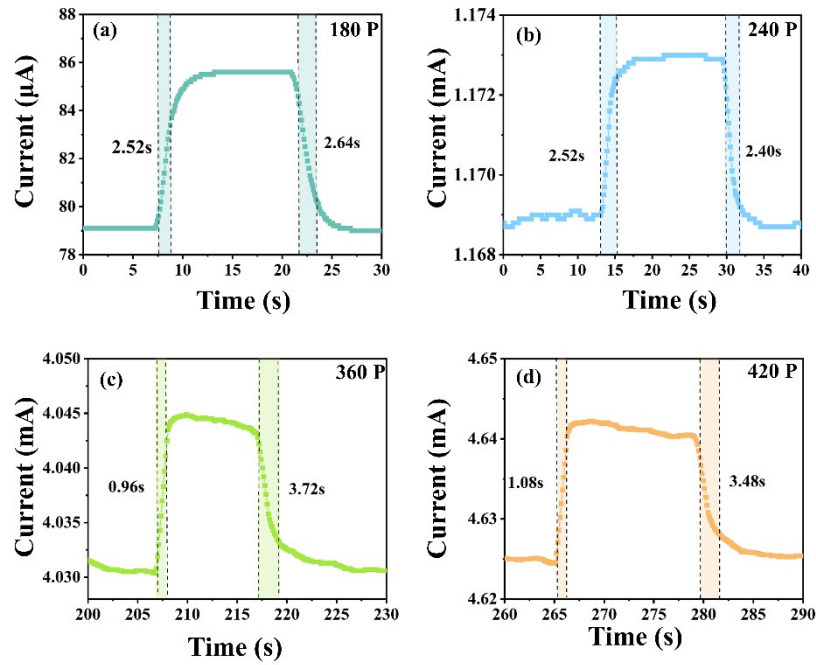

S3. Response time of Bi<sub>2</sub>Te<sub>3</sub> films (a) 180P, (b) 240P (c) 360P (d) 420 P.

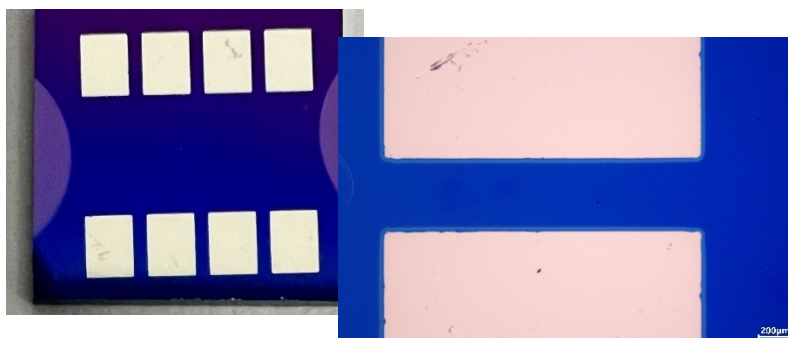

S4. Schematic diagram of the electrode of  $\text{Bi}_2\text{Te}_3$  thin film.

The XPS spectra of Bi and Te were measured, revealing that  $\text{Bi}_2\text{Te}_3$  underwent slight oxidation. The presence of oxygen caused ionization and dissociation during the photoelectric process, which prolonged the response time.

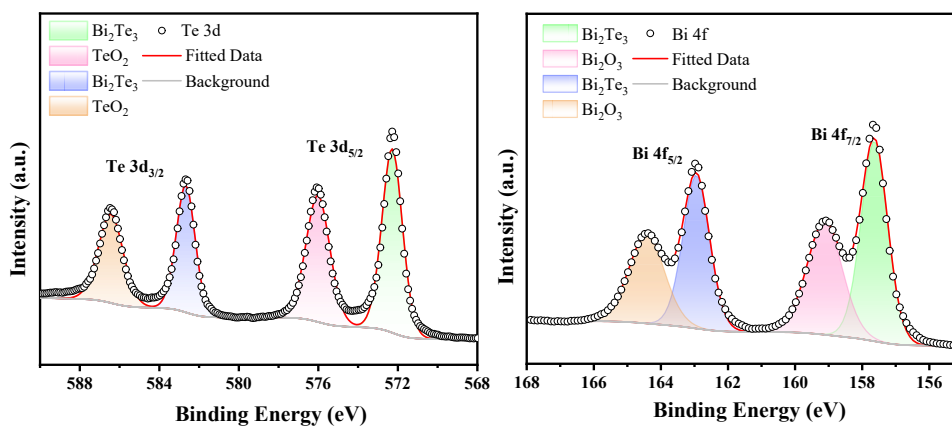

S5. XPS analysis spectra of Te 3d, and Bi 4f.
